# Caveolae and scaffold detection from single molecule localization microscopy data using deep learning

Ismail M. Khater<sup>1</sup><sup>\*</sup>, Stephane T. Aroca-Ouellette<sup>1</sup>, Fanrui Meng<sup>2</sup>, Ivan Robert Nabi<sup>2</sup>, Ghassan Hamarneh<sup>1</sup>

**1** Medical Image Analysis Lab, School of Computing Science, Simon Fraser University, Burnaby, BC V5A 1S6, Canada

**2** Department of Cellular and Physiological Sciences, LSI Imaging, Life Sciences Institute, University of British Columbia, Vancouver, BC V6T 1Z3, Canada

 These authors contributed equally to this work.

\* IMK email: ikhater@sfu.ca

## Abstract

Caveolae are plasma membrane invaginations whose formation requires caveolin-1 (Cav1), the adaptor protein polymerase I, and the transcript release factor (PTRF or CAVIN1). Caveolae have an important role in cell functioning, signaling, and disease. In the absence of CAVIN1, Cav1 forms non-caveolar membrane domains called scaffolds. In this work, we train machine learning models to automatically distinguish between caveolae and scaffolds from single molecule localization microscopy (SMLM) data. We apply machine and deep learning algorithms to discriminate biological structures from SMLM data. Our work is the first that is leveraging machine and deep learning approaches to automatically identifying biological structures from SMLM data. In particular, we develop and compare three binary classification methods to identify whether or not a given 3D cluster of Cav1 proteins is a caveolae. The first uses a random forest classifier applied to 28 hand-picked features, the second uses a convolutional neural net (CNN) applied to a projection of the point clouds onto three planes, and the third uses a PointNet model, a recent development that can directly take point clouds as its input. We validate our methods on a dataset of super-resolution microscopy images of PC3 prostate cancer cells labeled for Cav1. Specifically, we have images from two cell populations: 10 PC3 and 10 PTRF/CAVIN1-transfected PC3 cells (PC3-PTRF cells) that form caveolae. We obtained a balanced set of 1714 different cellular structures. Our results show that both the random forest on hand selected features and the deep learning approach achieve high accuracy in distinguishing the intrinsic features of the caveolae and non-caveolae biological structures. More specifically, both random forest and deep CNN classifiers achieve classification accuracy reaching 94% on our test set, while the PointNet model only reached 83% accuracy. We also discuss the pros and cons of the different approaches.

## Introduction

Caveolae are tiny structures of 50-100 nm plasma membrane invaginations [1] that have roles in membrane trafficking and signaling [2]. Caveolae formation require both Cav1 and CAVIN1 proteins. Secretion and overexpression of Cav1 in prostate cancer promotes tumor growth and has significant role in cancer metastasis [2]. Cav1 domains

are below the diffraction limit of the light microscopy (i.e. 250 nm) which makes it hard to study them using conventional microscopic imaging modalities. Recent advancements in microscopy technology have enabled light microscopes to break Abbe's diffraction limit. These techniques, known as super resolution microscopy, can reach resolutions of  $< 20$  nm in localizing the target protein [3]. Single molecule localization microscopy (SMLM) is a subset of techniques that work by manipulating the environment such that in each captured instance, a frame, only a few molecules are stochastically activated to emit light. Highly precise localizations can then be obtained from isolated point spread functions (PSFs) of isolated fluorophores (blinks). A 2D super resolution image can be obtained by stacking up thousands of the collected frames. To achieve a 3D SMLM image, a cylindrical lens is inserted so that the microscope captures a deformed Gaussian PSF for each molecule. The XY coordinates of the molecule are measured as the center of the PSF, while Z coordinate can be measured from the deformation of the PSF [3,4]. Consequently, the nanoscale 3D biological clusters with dimensions below the diffraction limit of optical light (i.e. 200-250nm) can be studied and visualized using the final 3D point cloud collected from the SMLM frames.

In this work, we focus on the analysis of SMLM images of PC3 cancer cell labeled with antibodies to the membrane protein caveolin-1 (Cav1). Cav1 can be localized to invaginated caveolae or non-caveolar scaffolds [5]. The presence of the CAVIN1 protein, a Cav1 adaptor protein, is required for the creation of a caveola [1]. Caveolae have functional roles in the cell as mechanoprotective membrane buffers, mechanosensors, signaling hubs and endocytic transporters [6]. The role of scaffolds is less well-characterized, in large part due to difficulties distinguishing these two Cav1-positive membrane domains, but they have been specifically associated with regulation of receptor signaling and prostate cancer progression [7,8]. The primary objective of our research is to identify whether a given Cav1-positive membrane structure is or is not a caveolae.

SMLM data is difficult for humans to visually inspect and manually analyze as the data is noisy and contains hundreds of thousands or millions of points representing complex cellular structures. As SMLM technology is a recent development, the majority of the published methods on SMLM are related to the image acquisition, with less published work about quantitative analyses from SMLM data. Among the SMLM quantification methods, many primarily investigate how to accurately segment 2D SMLM point clouds into clusters representing individual cellular structures. These cluster analysis methods currently rely on the extraction and analysis of a few primitive features (radius, density, number of points, etc.) to describe the 2D clusters as in Owen et al. [9,10], where they applied Ripley's functions to analyze the 2D clusters of super-resolution data. Beyond segmentation, some methods use the features to identify, group, and query of the different types of clusters. Lillemeier et al. [11] used the number of points per cluster and the cluster's radius to compare between the clusters of two SMLM imaging techniques for two types of cells. Rossy et al. [12] extracted cluster features that capture the circularity, number of points, radius, and density of every cluster and then found simple statistics for each feature alone to compare more than two types of clusters. Pigeon et al. [13] used the cluster density and diameter statistics to compare between two types of clusters. Caetano et al. [14] proposed an analytical tool that to extract cluster density, diameter, and size and then statistically compare different types of clusters based on these features. In the work of Rubin-Delanchy et al. [15], a simple statistic of each individual cluster feature was used to compare the clusters of two different types of cells. The primary features were the number of points, radius, and density, which were used to compare between two types of clusters. Levet et al. [16] proposed a software called SR-Tesseler that can be used to segment the 2D clusters and extract elementary features for them, but without training a system to

identify them automatically. The software extracts four simple features for every 2D cluster. Their software is capable of extracting the area, number of points, circularity, and diameter of the individual clusters.

The aforementioned methods used a small number of features to quantify and analyze 2D (not 3D) SMLM clusters. The feature extraction methods used on 2D SMLM data are not sufficient to effectively identify and analyze these 3D clusters. Fortunately, the explosive growth in the field of machine learning over the last decade has yielded a number of algorithms that are able to analyze large data such as 3D SMLM data. In addition to being able to learn more and perhaps currently unknown features on its own, the machine learning approaches will also be capable to combine and weigh its learned features to automatically classify molecular structures. To our knowledge, we are the first to use machine learning to help in the identification and analysis of the SMLM data clusters.

In order to better understand the nature of the caveolae and its role in human biology, in this work, we have employed and compared a number of machine learning algorithms for identifying the caveolar structures from 3D SMLM data of PC3 cells.

## Materials and methods

### Methods overview

The primary objective of this research is to be able to accurately predict the class labels of segmented cellular structures originating from SMLM images of the same type of cells. We call these segmented structures blobs. We have approached this problem as a binary classification problem: caveolae (positive) or not caveolae (negative). Our approach to this problem involves three steps (described in detail later in the paper):

- (i) **Data pre-processing:** De-noises and segments blobs from SMLM data;
- (ii) **Data representation:** Describes the blob representations used (i.e., the representation of the input to the next step) we denote the transformation of the representation as  $x \rightarrow g(x) = x'$  where  $x$  is an input blob as a point cloud,  $x'$  is a new representation of the same data; and  $g$  is the transformation function that may include transforming the point cloud into volumes, extract the 2D projections, etc.
- (iii) **Machine learning models:** Describes models used on each input representation and how they are trained to predict the class of a blob. We denote this prediction operation as  $x' \rightarrow f(x') = f(g(x)) = \hat{y}$ , where  $\hat{y}$  is the predicted class (i.e. caveolae or not). The function  $f$  is learned from a training set of  $M$  blobs with known class labels  $\{(x_i, y_i), i = 1, 2, \dots, M\}$

### Image acquisition

PC3 prostate cancer cells and PC3 cells stable transfected with PTRF/CAVIN1-green fluorescent protein (GFP) (PC3-PTRF) were cultured as previously described [1, 17] and plated on coverslips (NO. 1.5H, Carl Zeiss AG; coated with fibronectin) for 24 h before fixation with 3% paraformaldehyde (PFA) for 15 min at room temperature. Coverslips were rinsed with PBS/CM (phosphate buffered saline complemented with 1 mM MgCl<sub>2</sub> and 0.1 mM CaCl<sub>2</sub>), permeabilized with 0.2% Triton X-100 in PBS/CM, blocked with PBS/CM containing 10% goat serum (Sigma-Aldrich Inc.) and 1% bovine serum albumin (BSA, Sigma-Aldrich Inc.) and then incubated with the rabbit anti-caveolin-1 primary antibody (BD Transduction Labs Inc.) for 12 h at 4°C and with

Alexa Fluor 647-conjugated goat anti-rabbit secondary antibody (Thermo-Fisher Scientific Inc.) for 1 h at room temperature. The primary and secondary antibodies were diluted in SSC (saline sodium citrate) buffer containing 1% BSA, 2% goat serum and 0.05% Triton X-100. Cells were washed extensively after each antibody incubation with SSC buffer containing 0.05% Triton X-100, post-fixed using 3% PFA for 15 min and washed with PBS/CM. Before imaging, cells were immersed in imaging buffer (freshly prepared 10% glucose (Sigma-Aldrich Inc.), 0.5 mg/ml glucose oxidase (Sigma-Aldrich Inc.), 40  $\mu$ g/mL catalase (Sigma-Aldrich Inc.), 50 mM Tris, 10 mM NaCl and 50 mM  $\beta$ -mercaptoethylamine (MEA; Sigma-Aldrich Inc.) in double-distilled water [3,18] and sealed on a glass depression slide for imaging.

GSD super-resolution imaging was performed on a Leica SR GSD 3D system using a 160x objective lens (HC PL APO 160x/1.43, oil immersion), a 642 nm laser line and an EMCCD camera (iXon Ultra, Andor). Preview images were taken with 5% laser power in both the GFP and Alexa Fluor 647 channels for each cell, in TIRF (total internal reflection fluorescence) mode. Full laser power was then applied to pump the fluorophores to the dark state; at a frame correlation value of 25% the imaging program auto-switched to acquisition with 50% laser power, at 6.43 ms/frame speed. The TIRF mode was also applied to the acquisition step of the GSD super-resolution imaging to eliminate background signals. The event lists were generated using the Leica SR GSD 3D operation software with a XY pixel size of 20 nm, Z pixel size of 25 nm and Z acquisition range +/- 400 nm. The CAVIN1 masks for the PC3-PTRF cells were generated by converting the GFP-channel of the preview images to binary images in ImageJ.

## Data

The data used in this research comes from an experiment using PC3 prostate cancer cells. The experiment is first run on 10 SMLM images from CAVIN1 absent PC3 cells, which from now on will simply be referred to as PC3 cells. It is then rerun on PC3 cells transfected with PTRF/CAVIN1-GFP, called PC3-PTRF cells. Due to problems in the data gathering, cell 6 of the PC3 cells and cell 7 of the PC3-PTRF cells were omitted from the data, leaving us with 9 PC3 and 9 PC3-PTRF cells. The experiment additionally captured lower resolution wide-field microscopy images of the GFP channel of PC3-PTRF cells to identify the location of CAVIN1 within each cell Figure 2. This mask provides us with a strong indication of where the caveolae are located and hence, we use it as a ground truth to label the blobs. Therefore, the blobs in PC3-PTRF data are labelled as PTRF-positive (PTRF+) and PTRF-negative (PTRF-). We used this mask and the known biology that caveolae contain more than 60 Cav1 molecules [19] to stratify the PTRF+ blobs into  $\text{PTRF+} \geq 60$  and  $\text{PTRF+} < 60$ . Since caveolae cannot exist in PC3 cells, all blobs in PC3 cells were labeled as PTRF-negative (not caveolae or scaffold) as shown in the red color in Figure 1 —B.

For our binary classification task, the 9 PC3 cells provide us 14491 negative blobs. The PC3-PTRF cells provide us 857 positive blobs ( $\text{PTRF+} \geq 60$ ) and 10009 negative blobs (PTRF- and  $\text{PTRF+} < 60$ ). To solve this data imbalance, we randomly downsample the negatives from 24500 blobs to 857 blobs to match the number of positives blobs. Figure 1 —B and and Figure 2 show the blobs from the two populations and their corresponding class labels before and after the number of molecules stratification respectively.

**Fig 1. The process of obtaining Cav1 blobs (clusters) for the various learning tasks. Filtering, segmenting and labeling the blobs from the PC3 and PTRF/CAVIN1-transfected PC3 cells (PC3-PTRF cells)** a) 3D view of PC3 and PC3-PTRF cells showing all the blobs (3D clusters) within a cell after applying the *3D SMLM Network Analysis* computational pipeline [19]. The pipeline contains modules to reconstruct the Cav1 molecules via the iterative merging of the localizations, filtering the noisy localizations, and segmenting the Cav1 blobs. The different colors show the segmented Cav1 blobs within the cell. b) The blobs are color-labelled as PTRF-positive (PTRF+) and PTRF-negative (PTRF-). It shows that PC3 cell only has PTRF- blobs (non-caveolae blobs) that appear in red while the PC3-PTRF cell has both PTRF- and PTRF+ blobs that appear in red and blue respectively. c) A sample PTRF+ blob taken from the PC3-PTRF cell showing the Cav1 molecules distributions. d) A sample PTRF- blob taken from the PC3 cell showing the Cav1 molecules distributions.

**Fig 2. The process of obtaining the ground truth labels for the Cav1 blobs using wide-field CAVIN1 mask. The ground truth labels are necessary to train the deep learning and machine learning models to identify the Cav1 blobs types automatically.** The first row shows the imaged wide-field TIRF CAVIN1 mask before and after morphological closing. The morphological closing operation is used to close the small holes in the consecutive regions of CAVIN1 mask. The CAVIN1 regions are delineated in yellow to highlight the locations of the CAVIN1 regions in the cell. The second row shows the Cav1 blobs and the overlay of the Cav1 blobs with the wide-field CAVIN1 mask to label the blobs into PTRF+ and PTRF-. The caveolae structures have a minimum of 60 Cav1 molecule per blob [19] that can be used to stratify the PTRF+ blobs into  $\text{PTRF+} \geq 60$  and  $\text{PTRF+} < 60$ . Our goal is to use machine and deep learning approaches to automatically identify the  $\text{PTRF+} \geq 60$  blobs (caveolar domains) from the rest of the non-caveolar domains (i.e.  $\text{PTRF+} < 60$  and PTRF-) using different features and data representations of the blobs.

## Results and Discussion

### Data pre-processing

We adopt the computational pipeline of Khater et al. [19] to de-noise the clusters by eliminating probable duplicate points caused by the imaging technique (via their iterative merging algorithm) as well as removing single molecules not attached to a larger structure (via the filtering module). Their pipeline then segments each cluster into individual cellular structures, i.e., blobs. Figure 1 — A shows two cells from both populations (PC3 and PC3-PTRF) after the denoising and segmentation of the blobs. Figure 1 — B shows the blob labelling of PC3-PTRF cell using the corresponding CAVIN1 mask that creates two types of blobs, PTRF-positive (PTRF+) that match with the mask and PTRF-negative (PTRF-) not-caveolae blobs outside the mask. The caveolae structures have a minimum of 60 Cav1 molecule per blob [19]. Therefore, in Figure 2 we show the PTRF+ blobs are stratified based on the number of molecules into  $\text{PTRF+} \geq 60$  and  $\text{PTRF+} < 60$ . The PC3 cell expresses one type of blob in the absence of CAVIN1 protein. Hence, they mainly have one class label.

### Data representation

The application of the pre-processing pipeline results in a set of segmented blobs and their associated labels identifying them as caveolae ( $\text{PTRF+} \geq 60$ ) or not-caveolae

**Fig 3. Possible input representations of a point cloud with range  $R$  and number of points  $N$ .** a) Three projections of the 3D point cloud onto 2D planes. Requires  $3 \times R^2$  values to represent. b) A voxel representation. Requires  $R^3$  values to represent. c) Hand crafted features. Requires 28 values to represent d) A point cloud. Requires  $3 \times N$  values to represent. Where  $N$  is the number of points per blob

(PTRF- and PTRF+ < 60) as seen in Figure 1 — C and D respectively. The blobs are left in the original point cloud format. While this representation has some benefits, it also has drawbacks and is not commonly used in deep learning. We, therefore, investigate a number of different input representations. Figure 3 A-D shows the different representations a given blob can take for the different machine and deep learning tasks.

### Input (x)

Our SMLM dataset is 3D, i.e. contains location information for each molecule in all three dimensions. While the extra dimension provides additional information, which can improve the analysis of the data, three dimensional data also poses a number of possible pitfalls if one is not careful with how it is represented. The first is the size of the data. The first versions of SMLM were only two dimensional, and therefore images can be neatly represented on a plane divided into pixels. If we expand this idea into three dimensions by dividing a 3D area into voxels, we get an exponential increase in size. Since the maximum range of our data is 512 nm, using 1 nm as our subdivision unit, an increase from 2D to 3D increases the size of a single blob from 262 thousand  $2^{18}$  pixels to 134 million  $2^{27}$  voxels. The second pitfall is the sparsity of each input data. The largest number of points belonging to a single blob is 512 points. If we encode this data in a 2D plane such that each point is encoded as a pixel with a value of 1 and every other pixel is has a value of 0, the ratio of effective bits (non-zero) is  $2^9/2^{18} = 0.2\%$ . Expanding this to three dimensions and the ratio drops to  $2^9/2^{27} = 3e - 4\%$ . From the above, it is clear that a voxel representation is ill-suited for the task at hand. Instead, we represent the data in three ways that avoid the above pitfalls.

- (i) **Expert features:** Relies on a simple analysis of the blob to generate hand selected features reducing the input down to a size of 28 floating point numbers.
- (ii) **Multi-view:** Transforms the 3D point cloud by projecting it onto three orthogonal 2D planes forming three  $512 \times 512$  arrays of pixels.
- (iii) **Point cloud:** Keeps the original point cloud representation from SMLM. When stored as a set of points, the data ratio of effective bits is 100%, and has a size of a number of points  $(512) \times$  number of dimensions (3).

### Output (y)

We defined the output to be a one-hot encoding of the two classes, i.e.  $y = [1, 0]$  for positives, and  $y = [0, 1]$  for negatives. The two deep learning models (multi-view - CNN and point cloud - PointNet below) first find a set of representative features  $x' \rightarrow h(x') = X'$ , which are then linearly combined and passed through a softmax function  $X' \rightarrow \sigma(w^T X' + b) = \hat{y}$ , where  $w$  is a learned set of weights and  $b$  is learned bias. From this it follows that  $x \rightarrow f(g(x)) = \sigma(w^T h(g(x)) + b)$ . This approach significantly outperformed using a sigmoid to output a single number between 0 and 1.

### Different machine learning ML models

We have developed three models to best match the input representation.

**Fig 4. The architecture of the network used in the multi-view - CNN.** The layers of the CNN are: conv1 (3x32), pool1(3x3), conv2 (32x64), pool2 (3x3), conv3 (64x128), pool3 (3x3), conv4 (126x256), pool4 (3x3), conv5 (256x512), pool5 (3x3), FC (256), FC (512), FC (2)

### Expert features - random forest classifier

The first model relies on 28 hand-crafted features that were chosen to capture different properties of the blobs based on known biology (Figure 3 — C). The 28 features describe the size (volume, XYZ range), shape (spherical, planar, linear), topology (hollowness), and network measures (degree, modularity, characteristic path, etc.) of each individual blob. To extract the shape features, we represented each blob as 3D point cloud centered at the blob mean of the points positions. Then, we used the eigendecomposition of the  $N \times 3$  matrix of every blob (Figure 3 — D) to extract the eigenvalues associated to the eigenvectors of the 3D matrix representation using the principal components analysis PCA method. The extracted eigenvalues are used to extract the different shape features of the blob. We mainly extracted the planer, linear, spherical, and fractional anisotropy (FA) shape features of every blob [20]. The volume is calculated using the convex hull of the Delaunay triangulation of the 3D matrix of the blob (Figure 3 — D). The hollowness features are extracted from the distance to centroid of the blob. We calculated the minimum, maximum, average, median, and the standard deviation of the distances from every point to the centroid of the blob. To extract the network features for every blob we represented the blob as a network where the nodes represent the points and the edges represent the proximity between every pair of nodes. We picked the proximity threshold for the network construction such as every blob in our dataset is one connected component. Then, the network features [21] are extracted from the constructed network for every blob [19]. The final feature vector is composed of all the extracted features and has a dimension of  $1 \times 28$  [19] (Figure 3 — C).

We then trained a random forest (RF) classifier using 100 trees in Matlab based on the extracted features from all the blobs in the dataset and using the binary labels of every blob. A 10-fold cross-validation is used to evaluate the classification results as seen in the first row of Table 1. A leave-one-cell-out is used in another experiment to evaluate the classification results also as shown in the first row of Table 2.

### Multi-view - CNN

The second model uses a Convolutional Neural Net (CNN) on projections of the point clouds onto 3 planes (xy, yz, xz) representation as shown in Figure 3 — A. A simple CNN model using alternating layers of convolutions and pooling and two final fully connected (FC) layers worked well. Variations to this model showed no discernible improvement. The layers of the CNN are as follows (Figure 4): conv1 (3x32), pool1(3x3), conv2 (32x64), pool2 (3x3), conv3 (64x128), pool3 (3x3), conv4 (126x256), pool4 (3x3), conv5 (256x512), pool5 (3x3), FC (256), FC (512), FC (2). A ReLu activation function was used on every layer except for the final fully connected layer, which uses a softmax activation. A cross entropy loss was used for the objective function, with the addition of a L2 weight regularization term.

### Point cloud - PointNet

The third model is based on PointNet, which takes as input a set of 3D points. Minimal changes were made to the model described in [22]. In summary, PointNet uses the symmetric max function to enable its input to be unordered, as in the case of a point

cloud. A number of hidden layers are used before the max function to transform the points into a higher dimensional space. The output of the max function is a representation of the point cloud and is passed through an FC network to classify the blob. For more detail see [22]. The alterations made are the removal of the dropout layer and of the data jittering, both of which were found to lower results. Consistent with the multi-view model, a cross entropy loss was used.

## Evaluation Methodology

To evaluate our model, we divide the 1714 blobs (the positive and the sampled negative blobs) into a training set, a validation set, and a test set in two different ways. The first way of creating the sets involves mixing the blobs of each cell, then keeping 200 blobs as a test set, using 100 blobs as a validation set, and using the remaining 1414 blobs as a training set. The second way is keeping cell 1, containing 124 blobs, as a test set, using cell 2, containing 100 blobs, as validation, and using the remaining 1290 blobs from the other cells as a training set. Each of the above sets is balanced in terms of negative and positive blobs. The use of the two groupings reveals if the data from one cell can be generalized to other cells.

## Mixed blobs

**Table 1. Test set results on mixed cells**

|             | Accuracy | Sensitivity | Specificity |
|-------------|----------|-------------|-------------|
| Features    | 0.92     | 0.97        | 0.86        |
| Multi-view  | 0.92     | 0.98        | 0.85        |
| Point cloud | 0.81     | 0.79        | 0.83        |

Results using sets made with blobs from each cell.

From the above results, we see that the hand designed features and multi-view models generate similar results, while the point cloud model falls behind. A fundamental difference between the point cloud input and the other inputs is that it is un-ordered i.e. a blob can be mapped to more than one representation. The hand designed features have a human chosen order. The multi-view input is a projection of the data on a 2D plane, which forces the data into a geometrical ordering. In point clouds, however, changing the order of the points does not change the underlying blob. The results would support the hypothesis that a useful order to data benefits data analysis.

While it does perform worse on the primary metrics, it is important to note that the point cloud input does have some advantages. First, compared to the hand designed features, it does not require any preliminary analysis or expert knowledge. Second, compared to multi-view, the input data size is significantly smaller, and consequently, the model trains significantly faster. Finally, if segmentation of caveolae was a concern, both hand designed features and multi-view would encounter major obstacles, but it has been demonstrated in [22] that it is possible to segment point clouds using PointNet.

## Cell-wise blobs

From the cell-wise results, we can show that knowledge learned can be generalized to other cells. This is important as it demonstrates the usefulness of this model on unlabeled blobs from future cells. The small increase in performance could be due to the slightly larger training set, or simply that the randomly chosen test cell contained an easier set of blobs to identify.



**Table 2. Test set results using segregated cell**

|             | Accuracy | Sensitivity | Specificity |
|-------------|----------|-------------|-------------|
| Features    | 0.94     | 0.97        | 0.90        |
| Multi-view  | 0.94     | 0.98        | 0.90        |
| Point cloud | 0.83     | 0.72        | 0.96        |

Results using sets where each set uses different cells.

In both tables, the multi-view and hand selected features approaches performed similarly well. However, we believe that an increase in dataset size may be more beneficial to the deep learning approach, meaning that using a larger dataset may allow the multi-view approach to surpass the hand selected features. We hope to test on a larger dataset in the future to confirm this hypothesis.

The higher sensitivity (in both Table 1 and Table 2) suggests that our learned models are capable to identify the caveolae blobs more accurately, whereas the relative lower specificity means that our learned models are less accurate in identifying the scaffolds. This opens the door for further study of the scaffolds and suggests that those biological structures are more complex and have higher variation than the positive blobs. We expect more than one sub-category in the negative blobs. Moreover, the negative blobs in PC3 population might be different from the negative blobs in PC3-PTRF population (i.e. the CAVIN1 might also affect the structure of the scaffolds). We leave this investigation for the future as it requires more biological experiments and data.

## Hand crafted VS. deep features

Multiple data representations have a critical impact on the performance of the final semantic learning task. For classification task, the separability of the classes is highly dependent on the features and the way they were extracted. Figure 5 shows the t-SNE visualization of the features where the high-dimensional feature space is projected onto a 2-dimensional space [23]. The hand crafted and multi-view CNN features are more clustered and separable compared to the PointNet features. However, the classes in this 2D projected view are not perfectly separable. This is likely due to the negative class having many complex subcategories, which depicts the complexity of the classification tasks at hand.

The trade-offs between the different methods used to represent and classify the blobs in this work involve time and space (memory) complexity of training and inference, classification accuracy achieved, interpretability of the discriminant features, and the level of automation required (amount of human involvement).

The key advantage of deep learning is that it avoids the manual process of constructing and selecting hand designed and engineered features and that it boasts fast inference. However, the requirement of large training dataset, large computational resources for training, and its opaque uninterpretable, black box models are still major issues in deep learning.

Deep learning approaches that operate directly on unstructured data, such as PointNet that consumes the point cloud directly without any transformation, have the additional advantage of retaining the compactness and precision of the original data.

We hypothesize that the inferior classification accuracy performance of PointNet is due to its unordered input. PointNet was originally tested using a dataset that is an order of magnitude larger than ours, and it is possible that with a larger dataset the model would be able to learn to overcome the unordered nature of its input.

Multi-view CNN capitalizes on the highly successful CNNs to achieve superior performance in classification accuracy but at the expense of long training times and

**Fig 5. 2D t-SNE visualization of the projected feature space from the various data representations used for identifying the Cav1 blobs.** We visualize the projection of high-dimensional feature space into 2-dimensional space using t-SNE from the multi-view CNN, point cloud - PointNet, and hand crafted features. Every point in the t-SNE plot represents the projected features of a blob. The red, green, and blue points represent the projected features of the PTRF-, PTRF+ < 60, and PTRF+  $\geq$  60 blobs respectively.

requiring large underlying representations, i.e. a large number of small pixels, needed to diminish quantization errors (compared with the pure 3D point cloud input adopted by PointNet).

Albeit being easily interpretable (which Multi-view CNN and PointNet are not) and achieving higher accuracy than PointNet, hand crafted features used in conjunction with classical machine learning approaches (e.g. RF) require prior expert knowledge of the biological structures in order to design and select features, which is may not always be feasible especially in scientific discovery.

## Conclusion

Our research into the analysis of super resolution images using machine learning algorithms has yielded a number of successful techniques that can be used to accurately and automatically predict whether or not a blob is a caveolae. Both using hand selected features, as well as applying a convolutional neural net to projections of the point cloud, performed similarly well while using PointNet on a point cloud was less successful. Classifying biological structures at the cell membrane is of importance as it allows the biologist to study the relationship between structure and function. It could also be used to identify biomarkers for the different structures that could enable drug design at the molecular level and potentially lead to disease therapy.

## Future work

Further research on this topic would greatly benefit from additional labelled data. SMLM data for both PC3 and CAVIN1 from the same labeled cell would provide additional and more precise labels than the current method which relies on a wide-field TIRF CAVIN1 mask of lower resolution. Additional data would include double labeled SMLM images with high-resolution localizations for both Cav1 and CAVIN1 that would provide us with a more accurate ground truth blob label.

While the current methodology relies on binary classification, caveolae or not-caveolae, it is likely that the not-caveolae class may be better represented as many classes. Using unsupervised methods such as k-means or mixture of Gaussians can allow us to subclassify the non-caveolae structures into more representative classes [19]. Applying similar models to ones described in this paper to a multi-class version of the problem may increase performance if the classes are better a representation of the true data.

Future work could also involve examining methods for interpreting deep learning models (e.g. [24]) applied to biological structures, and exploring research trends in unsupervised deep learning. It will also be interesting to explore developing deep neural network layers from the ground up particularly targeted to processing typical visual patterns seen in biological structures (as opposed typical man-made objects common in computer graphics applications).

## Acknowledgments

Supported by grants from the CIHR (MOP-126029), NSERC, Prostate Cancer Canada and CFI/BCKDF (IRN, GH) and a China Scholarship Council doctoral fellowship (FM). We thank Dr. Keng Chou (Chemistry, UBC) for helpful comments and discussion.

## References

1. Hill MM, Bastiani M, Luetterforst R, Kirkham M, Kirkham A, Nixon SJ, et al. PTRF-Cavin, a conserved cytoplasmic protein required for caveola formation and function. *Cell*. 2008;132(1):113–124.
2. Nassar ZD, Hill MM, Parton RG, Parat MO. Caveola-forming proteins caveolin-1 and PTRF in prostate cancer. *Nature reviews Urology*. 2013;10(9):529.
3. Huang B, Wang W, Bates M, Zhuang X. Three-dimensional super-resolution imaging by stochastic optical reconstruction microscopy. *Science*. 2008;319(5864):810–813.
4. Fölling J, Bossi M, Bock H, Medda R, Wurm CA, Hein B, et al. Fluorescence nanoscopy by ground-state depletion and single-molecule return. *Nature methods*. 2008;5(11):943–945.
5. Lajoie P, Goetz JG, Dennis JW, Nabi IR. Lattices, rafts, and scaffolds: domain regulation of receptor signaling at the plasma membrane. *The Journal of cell biology*. 2009;185(3):381–385.
6. Parton RG, Del Pozo MA. Caveolae as plasma membrane sensors, protectors and organizers. *Nature reviews Molecular cell biology*. 2013;14(2):98–112.
7. Moon H, Lee CS, Inder KL, Sharma S, Choi E, Black DM, et al. PTRF/cavin-1 neutralizes non-caveolar caveolin-1 microdomains in prostate cancer. *Oncogene*. 2014;33(27):3561–3570.
8. Lajoie P, Partridge EA, Guay G, Goetz JG, Pawling J, Lagana A, et al. Plasma membrane domain organization regulates EGFR signaling in tumor cells. *J Cell Biol*. 2007;179(2):341–356.
9. Owen DM, Rentero C, Rossy J, Magenau A, Williamson D, Rodriguez M, et al. PALM imaging and cluster analysis of protein heterogeneity at the cell surface. *Journal of biophotonics*. 2010;3(7):446–454.
10. Owen DM, Williamson DJ, Magenau A, Gaus K. Sub-resolution lipid domains exist in the plasma membrane and regulate protein diffusion and distribution. *Nature communications*. 2012;3:1256.
11. Lillemeier BF, Mörtelmaier MA, Forstner MB, Huppa JB, Groves JT, Davis MM. TCR and Lat are expressed on separate protein islands on T cell membranes and concatenate during activation. *Nature immunology*. 2010;11(1):90–96.
12. Rossy J, Owen DM, Williamson DJ, Yang Z, Gaus K. Conformational states of the kinase Lck regulate clustering in early T cell signaling. *Nature immunology*. 2013;14(1):82–89.

13. Pagoon SV, Cordoba SP, Owen DM, Rothery SM, Oszmiana A, Davis DM. Superresolution microscopy reveals nanometer-scale reorganization of inhibitory natural killer cell receptors upon activation of NKG2D. *Science signaling*. 2013;6(285):ra62–ra62.
14. Caetano FA, Dirk BS, Tam JH, Cavanagh PC, Goiko M, Ferguson SS, et al. MIiSR: molecular interactions in super-resolution imaging enables the analysis of protein interactions, dynamics and formation of multi-protein structures. *PLoS computational biology*. 2015;11(12):e1004634.
15. Rubin-Delanchy P, Burn GL, Griffié J, Williamson DJ, Heard NA, Cope AP, et al. Bayesian cluster identification in single-molecule localization microscopy data. *Nature methods*. 2015;12(11):1072.
16. Levet F, Hosy E, Kechkar A, Butler C, Beghin A, Choquet D, et al. SR-Tesseler: a method to segment and quantify localization-based super-resolution microscopy data. *Nature methods*. 2015;12(11):1065.
17. Meng F, Joshi B, Nabi IR. Galectin-3 overrides PTRF/Cavin-1 reduction of PC3 prostate cancer cell migration. *PloS one*. 2015;10(5):e0126056.
18. Dempsey GT, Vaughan JC, Chen KH, Bates M, Zhuang X. Evaluation of fluorophores for optimal performance in localization-based super-resolution imaging. *Nature methods*. 2011;8(12):1027–1036.
19. Khater IM, Meng F, Wong TH, Nabi IR, Hamarneh G. Super Resolution Network Analysis Defines the Molecular Architecture of Caveolae and Caveolin-1 Scaffolds. *Scientific reports*. 2018;8(1):9009.
20. Westin CF. Geometrical diffusion measures for MRI from tensor basis analysis. *Proc ISMRM'97*. 1997;.
21. Newman ME. The structure and function of complex networks. *SIAM review*. 2003;45(2):167–256.
22. Qi CR, Su H, Mo K, Guibas LJ. Pointnet: Deep learning on point sets for 3d classification and segmentation. *arXiv preprint arXiv:161200593*. 2016;.
23. Maaten Lvd, Hinton G. Visualizing data using t-SNE. *Journal of machine learning research*. 2008;9(Nov):2579–2605.
24. Ribeiro MT, Singh S, Guestrin C. Why should i trust you?: Explaining the predictions of any classifier. In: *Proceedings of the 22nd ACM SIGKDD international conference on knowledge discovery and data mining*. ACM; 2016. p. 1135–1144.

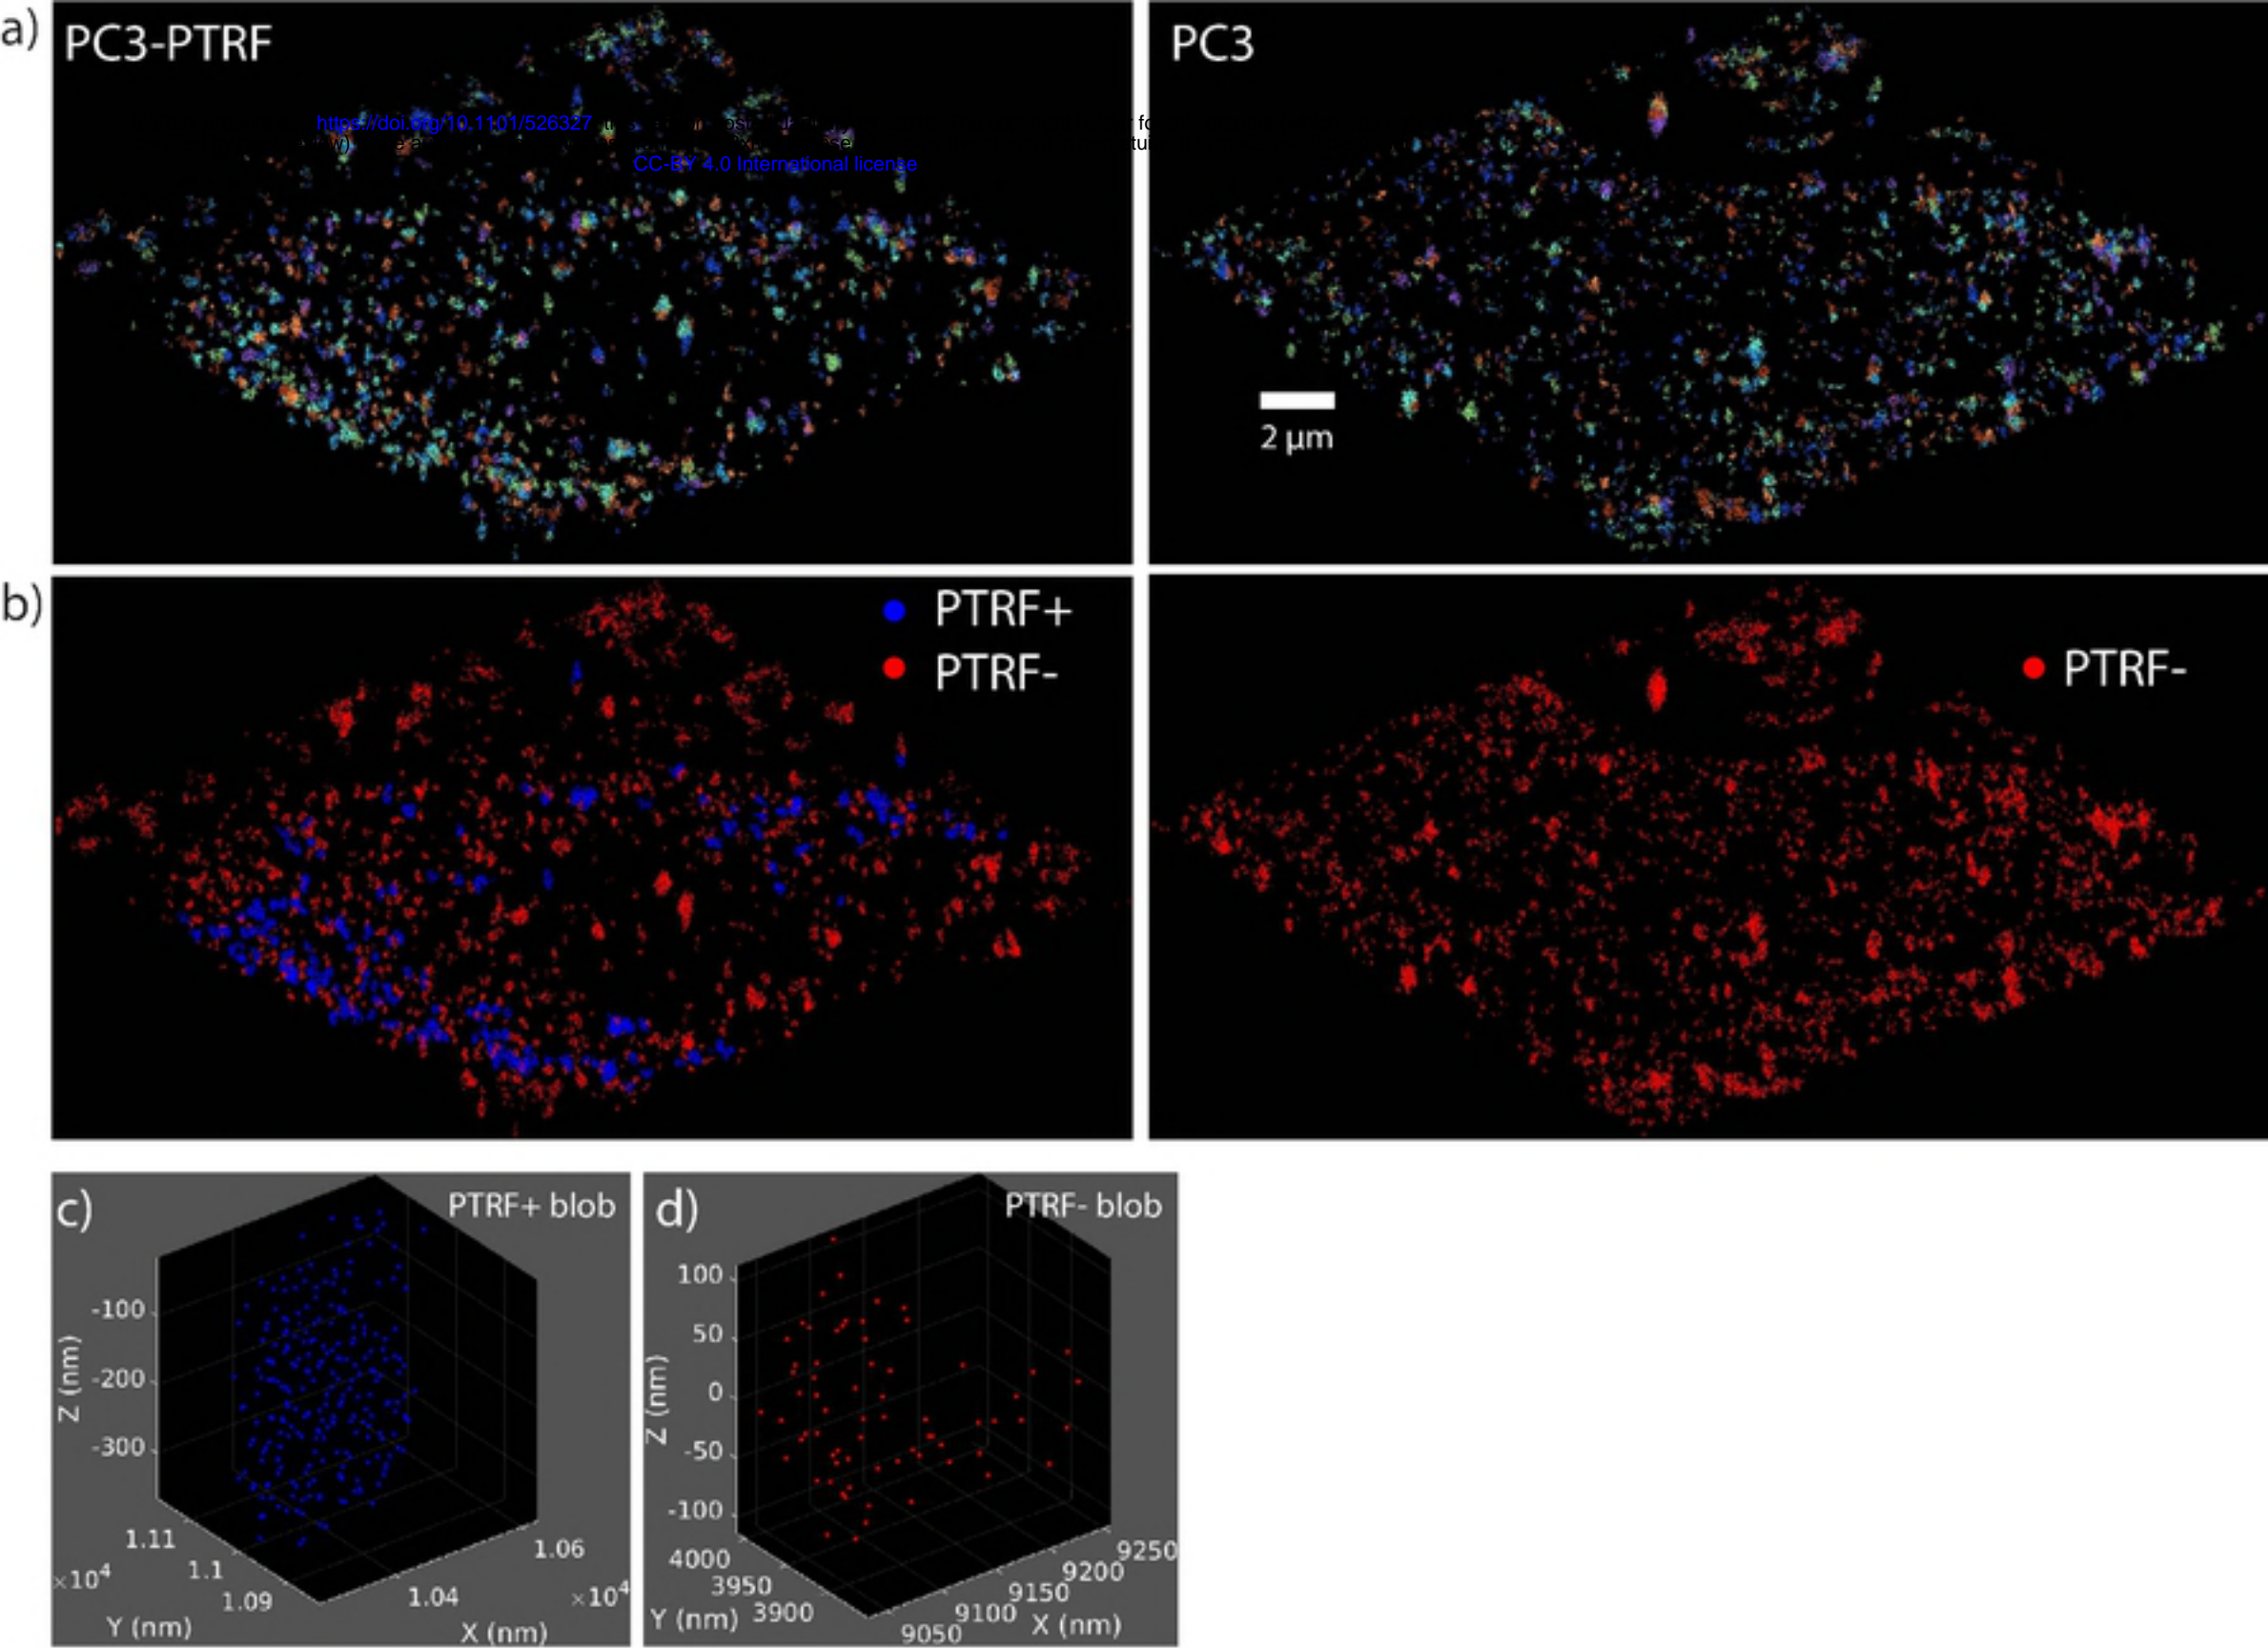

Khater et al, Figure 1  
The paper figures
